# Supplementary material for: Microbial Responses to the Reduction of Chemical Fertilizers in the Rhizosphere Soil of Flue-Cured Tobacco
Source: Front Bioeng Biotechnol. 2022 Jan 11;9:812316. doi: 10.3389/fbioe.2021.812316 (PMC8787768; doi:10.3389/fbioe.2021.812316)
Supplement: Supplementary file 1 [file Table1.xlsx]

## Sheet: corr
	g__Geodermatophilus	g__norank_f__norank_o__Gaiellales	g__Acidothermus	g__norank_f__norank_o__norank_c__JG30-KF-CM66	g__Pseudolabrys	g__Ellin6067	g__Conexibacter	g__Candidatus_Solibacter	g__Bradyrhizobium	g__norank_f__norank_o__IMCC26256	g__Blastococcus	g__norank_f__norank_o__C0119	g__norank_f__JG30-KF-CM45	g__norank_f__norank_o__norank_c__TK10	g__Jatrophihabitans	g__norank_f__norank_o__Frankiales	g__norank_f__SC-I-84	g__Bryobacter	g__Streptomyces	g__norank_f__Gemmatimonadaceae	g__Paenibacillus	g__Occallatibacter	g__norank_f__norank_o__norank_c__norank_p__WPS-2	g__unclassified_k__norank_d__Bacteria	g__norank_f__Isosphaeraceae	g__norank_f__Gemmataceae	g__Candidatus_Koribacter	g__unclassified_o__Acidobacteriales	g__norank_f__norank_o__Acidobacteriales	g__norank_f__norank_o__B12-WMSP1	g__norank_f__Acidobacteriaceae_Subgroup_1	g__norank_f__norank_o__Elsterales	g__norank_f__WWH38	g__norank_f__JG30-KF-AS9	g__Bacillus	g__Nocardioides	g__Sporosarcina	g__unclassified_o__Saccharimonadales	g__Gemmatimonas	g__unclassified_f__Intrasporangiaceae	g__Allorhizobium-Neorhizobium-Pararhizobium-Rhizobium	g__Arthrobacter	g__Terrabacter	g__Ralstonia	g__Sphingomonas	g__Massilia	g__norank_f__LWQ8	g__Burkholderia-Caballeronia-Paraburkholderia	g__Leifsonia
g__Geodermatophilus	1	0.74782	0.44093	0.38449	0.13757	0.49385	0.32156	0.11993	-0.09877	0.30213	0.321	0.00353	0.3092	0.31747	0.27916	0.51148	0.53712	0.51148	0.2187	0.51854	0.19469	-0.21518	-0.2822	0.03534	-0.18728	-0.16226	-0.56461	-0.3598	-0.23987	-0.0388	-0.27514	0.47621	0.49471	0.66317	0.25398	0.16226	0.26856	-0.04233	-0.17845	-0.20459	-0.21518	-0.37038	-0.51854	0.07408	-0.05997	-0.07408	0.13404	0.0388	-0.22929
g__norank_f__norank_o__Gaiellales	0.74782	1	0.58042	0.46853	0.39161	0.76224	0.5289	0.32867	0.07692	0.55692	0.58042	0.11189	0.35377	0.51748	0.71103	0.8042	0.84413	0.58741	0.48951	0.77622	0.44913	-0.3007	-0.3007	-0.01751	-0.10508	-0.06993	-0.26316	-0.06294	0.06993	0.09091	-0.04196	0.34266	0.43082	0.53147	0.25874	0.13287	0.19965	-0.1049	0.15061	-0.26573	-0.46154	-0.53846	-0.68531	-0.12587	-0.35664	-0.42657	-0.1958	-0.16084	-0.41259
g__Acidothermus	0.44093	0.58042	1	0.86713	0.46154	0.61538	0.82312	0.43357	0.27972	0.31173	0.56643	0.06993	0.56392	0.58042	0.54991	0.64336	0.57793	0.27273	0.14685	0.23077	-0.0807	-0.16783	-0.37063	0.4028	0.36778	0.30769	-0.2386	-0.1049	0	0.04895	-0.01399	0.56643	0.31874	0.31469	0.23077	-0.08392	0.09457	-0.1958	-0.2697	-0.0979	-0.02797	-0.46154	-0.20979	0.16084	-0.00699	-0.16084	0.00699	-0.18182	-0.38462
g__norank_f__norank_o__norank_c__JG30-KF-CM66	0.38449	0.46853	0.86713	1	0.18881	0.37762	0.61646	0.18182	0.1049	0.16813	0.41259	-0.11888	0.27671	0.32168	0.34676	0.37762	0.35727	0.1958	-0.11189	-0.01399	-0.04211	0.08392	-0.26573	0.41331	0.38179	0.30769	-0.12632	-0.02098	-0.03497	0.05594	0.08392	0.55245	0.12609	0.27972	0.11888	-0.12587	0.11559	-0.18881	-0.33976	-0.27972	-0.07692	-0.37762	-0.23077	-0.05594	0	-0.11189	0.08392	-0.18881	-0.36364
g__Pseudolabrys	0.13757	0.39161	0.46154	0.18881	1	0.6993	0.61646	0.73427	0.6993	0.46935	0.5035	0.32867	0.42732	0.56643	0.57793	0.51748	0.55692	0.17483	0.35664	0.39161	-0.17895	-0.44056	-0.6014	0.08757	-0.03853	-0.21678	-0.39649	-0.42657	-0.21678	-0.16084	-0.43357	0.1049	0.03152	0.13287	0.27972	0.27273	-0.2662	-0.29371	0.06655	0.04895	0.25175	0.02098	-0.02797	0.51049	0.16783	-0.1049	-0.1049	0.29371	-0.02098
g__Ellin6067	0.49385	0.76224	0.61538	0.37762	0.6993	1	0.69702	0.51049	0.30769	0.69702	0.56643	-0.06993	0.28722	0.39161	0.49037	0.73427	0.64799	0.18182	0.27972	0.55944	-0.01053	-0.38462	-0.48951	0.03853	-0.16813	-0.2028	-0.45614	-0.44056	-0.26573	-0.26573	-0.28671	0.28671	0.32574	0.18182	0.46853	0.37063	0.08406	-0.08392	0.14711	-0.00699	-0.1958	-0.23077	-0.25175	0.16783	0.0979	-0.06993	0.04196	0.22378	0.04196
g__Conexibacter	0.32156	0.5289	0.82312	0.61646	0.61646	0.69702	1	0.2697	0.21366	0.17544	0.37828	-0.04203	0.37544	0.33625	0.44912	0.44483	0.43333	0.22417	0.11909	0.16813	-0.06503	-0.16462	-0.38179	0.09298	0.04561	-0.09807	-0.44113	-0.29422	-0.22417	-0.20666	-0.14361	0.67251	0.57193	0.44133	0.51839	0.2697	0.3	0.05954	-0.21404	-0.19615	-0.06305	-0.3993	-0.30123	0.2662	0.20666	0.02452	0.21366	-0.01751	-0.04203
g__Candidatus_Solibacter	0.11993	0.32867	0.43357	0.18182	0.73427	0.51049	0.2697	1	0.83916	0.50788	0.67133	0.65035	0.75307	0.84615	0.60245	0.71329	0.70753	0.21678	0.5035	0.5035	-0.19298	-0.56643	-0.54545	0.18914	0.14711	0.06993	0.09123	-0.2028	0.12587	0.05594	-0.33566	-0.27972	-0.31173	-0.25175	-0.17483	-0.28671	-0.72855	-0.73427	0.31173	0.37063	0.47552	0.12587	0.26573	0.40559	-0.07692	-0.33566	-0.3986	0.15385	-0.36364
g__Bradyrhizobium	-0.09877	0.07692	0.27972	0.1049	0.6993	0.30769	0.21366	0.83916	1	0.48687	0.68531	0.48252	0.47286	0.61538	0.43082	0.37063	0.40981	0.00699	0.29371	0.25874	-0.20351	-0.36364	-0.48252	0.2697	0.35026	0.12587	0.12281	-0.18881	-0.04895	-0.01399	-0.45455	-0.35664	-0.49037	-0.29371	-0.38462	-0.25874	-0.77758	-0.8042	0.37828	0.48252	0.47552	0.37762	0.45455	0.42657	0.18182	-0.20979	-0.18182	0.35664	-0.18182
g__norank_f__norank_o__IMCC26256	0.30213	0.55692	0.31173	0.16813	0.46935	0.69702	0.17544	0.50788	0.48687	1	0.74606	-0.07005	0.05439	0.36427	0.41053	0.63748	0.52105	0.07706	0.24518	0.5359	0.0949	-0.40631	-0.43082	0.22982	0.20175	0.17513	-0.15993	-0.19965	-0.17163	-0.08056	-0.33275	-0.24869	-0.22456	-0.1366	-0.03853	0.10858	-0.21404	-0.30123	0.4386	0.28722	-0.28371	0.08406	0.02102	-0.02452	-0.00701	-0.22767	-0.12609	0.36427	-0.03152
g__Blastococcus	0.321	0.58042	0.56643	0.41259	0.5035	0.56643	0.37828	0.67133	0.68531	0.74606	1	0.18881	0.43433	0.67133	0.63398	0.67133	0.6655	0.43357	0.55944	0.58741	0.31579	-0.48951	-0.56643	0.09807	0.28371	0.21678	0.08421	-0.02797	0.07692	-0.0979	-0.34965	-0.2028	-0.23117	-0.02098	-0.35664	-0.3986	-0.36778	-0.65035	0.5289	0.47552	-0.08392	0.08392	0	-0.13287	-0.1958	-0.58741	-0.37762	0.18182	-0.30769
g__norank_f__norank_o__C0119	0.00353	0.11189	0.06993	-0.11888	0.32867	-0.06993	-0.04203	0.65035	0.48252	-0.07005	0.18881	1	0.78459	0.76923	0.54291	0.45455	0.58494	0.38462	0.5035	0.37762	-0.0386	-0.41259	-0.14685	0.05254	0.12259	0.07692	0.31228	0.15385	0.43357	0.46853	-0.02797	-0.25175	-0.11909	-0.01399	-0.21678	-0.37063	-0.61646	-0.5035	0.1331	0.00699	0.5035	-0.11189	0.03497	0.42657	-0.33566	-0.35664	-0.46154	-0.25874	-0.65734
g__norank_f__JG30-KF-CM45	0.3092	0.35377	0.56392	0.27671	0.42732	0.28722	0.37544	0.75307	0.47286	0.05439	0.43433	0.78459	1	0.89667	0.60702	0.69702	0.72281	0.43783	0.54291	0.46235	-0.0949	-0.45884	-0.30123	0.15439	0.15614	0.15412	0.10545	-0.01051	0.33976	0.2662	-0.07356	0.08757	0.14561	0.09807	-0.07706	-0.42382	-0.42807	-0.52189	0	0.15762	0.44483	-0.27671	0.00701	0.4028	-0.24869	-0.34326	-0.36077	-0.2697	-0.62697
g__norank_f__norank_o__norank_c__TK10	0.31747	0.51748	0.58042	0.32168	0.56643	0.39161	0.33625	0.84615	0.61538	0.36427	0.67133	0.76923	0.89667	1	0.83012	0.82517	0.87216	0.53846	0.67832	0.64336	0.10526	-0.52448	-0.3986	0.22067	0.28021	0.27273	0.12632	0.0979	0.3986	0.34965	-0.09091	-0.05594	-0.03853	0.11888	-0.18881	-0.41958	-0.47286	-0.59441	0.15061	0.15385	0.23776	-0.26573	-0.11189	0.25874	-0.41259	-0.57343	-0.55245	-0.23776	-0.72028
g__Jatrophihabitans	0.27916	0.71103	0.54991	0.34676	0.57793	0.49037	0.44912	0.60245	0.43082	0.41053	0.63398	0.54291	0.60702	0.83012	1	0.78109	0.88421	0.54641	0.72855	0.77408	0.44816	-0.2697	-0.18214	0.16491	0.24561	0.2627	0.11951	0.33625	0.51839	0.45184	0.18214	0.10858	0.1386	0.35377	-0.08406	-0.18914	-0.14386	-0.35026	0.17193	-0.11909	-0.23468	-0.5289	-0.50788	0	-0.59895	-0.71103	-0.59895	-0.44133	-0.72855
g__norank_f__norank_o__Frankiales	0.51148	0.8042	0.64336	0.37762	0.51748	0.73427	0.44483	0.71329	0.37063	0.63748	0.67133	0.45455	0.69702	0.82517	0.78109	1	0.94571	0.46154	0.56643	0.76224	0.13684	-0.53147	-0.37762	0.18214	0.12259	0.18182	-0.04912	-0.02797	0.23776	0.23077	-0.04895	0.06993	0.18564	0.13986	0.13287	-0.1049	-0.19264	-0.32867	0.20315	0.01399	-0.1049	-0.42657	-0.28671	0.12587	-0.36364	-0.44056	-0.37762	-0.17483	-0.55245
g__norank_f__SC-I-84	0.53712	0.84413	0.57793	0.35727	0.55692	0.64799	0.43333	0.70753	0.40981	0.52105	0.6655	0.58494	0.72281	0.87216	0.88421	0.94571	1	0.61296	0.67601	0.82662	0.28823	-0.50088	-0.37478	0.0807	0.05614	0.07356	-0.01406	0.03152	0.30123	0.28722	-0.05604	0.08056	0.18947	0.29422	0.05604	-0.14011	-0.22807	-0.40631	0.23158	-0.08757	-0.08757	-0.44133	-0.42732	0.11208	-0.45534	-0.56042	-0.45534	-0.23117	-0.65499
g__Bryobacter	0.51148	0.58741	0.27273	0.1958	0.17483	0.18182	0.22417	0.21678	0.00699	0.07706	0.43357	0.38462	0.43783	0.53846	0.54641	0.46154	0.61296	1	0.72028	0.53846	0.61053	-0.60839	-0.4965	-0.48687	-0.29072	-0.23776	-0.07018	0.03497	0.2028	-0.06993	-0.23077	0.02098	0.22767	0.4965	-0.01399	-0.32867	0.08757	-0.11888	0.24518	-0.05594	-0.11189	-0.18881	-0.57343	-0.28671	-0.55245	-0.67133	-0.52448	-0.13287	-0.39161
g__Streptomyces	0.2187	0.48951	0.14685	-0.11189	0.35664	0.27972	0.11909	0.5035	0.29371	0.24518	0.55944	0.5035	0.54291	0.67832	0.72855	0.56643	0.67601	0.72028	1	0.82517	0.65614	-0.51049	-0.25874	-0.38179	-0.20315	-0.06294	0.21755	0.27273	0.54545	0.09091	-0.02098	-0.25874	0.04904	0.18182	-0.28671	-0.44056	-0.17863	-0.34965	0.51138	0.32168	-0.13986	-0.15385	-0.37063	-0.26573	-0.71329	-0.86014	-0.81818	-0.25874	-0.43357
g__norank_f__Gemmatimonadaceae	0.51854	0.77622	0.23077	-0.01399	0.39161	0.55944	0.16813	0.5035	0.25874	0.5359	0.58741	0.37762	0.46235	0.64336	0.77408	0.76224	0.82662	0.53846	0.82517	1	0.57544	-0.34266	-0.12587	-0.09807	-0.1296	0	0.01754	0.16084	0.3986	0.24476	0.02797	-0.06993	0.19615	0.30769	-0.11888	-0.11189	-0.09457	-0.31469	0.41331	0.11189	-0.36364	-0.37063	-0.5035	-0.13287	-0.59441	-0.66434	-0.55944	-0.23776	-0.48252
g__Paenibacillus	0.19469	0.44913	-0.0807	-0.04211	-0.17895	-0.01053	-0.06503	-0.19298	-0.20351	0.0949	0.31579	-0.0386	-0.0949	0.10526	0.44816	0.13684	0.28823	0.61053	0.65614	0.57544	1	-0.01053	0.12983	-0.42531	-0.15114	0.00702	0.28697	0.55439	0.50878	0.12983	0.26667	-0.10526	0.12654	0.37895	-0.34386	-0.31228	0.2812	-0.00351	0.45343	0.01754	-0.68421	-0.26667	-0.66316	-0.7579	-0.75439	-0.7965	-0.58597	-0.38597	-0.31228
g__Occallatibacter	-0.21518	-0.3007	-0.16783	0.08392	-0.44056	-0.38462	-0.16462	-0.56643	-0.36364	-0.40631	-0.48951	-0.41259	-0.45884	-0.52448	-0.2697	-0.53147	-0.50088	-0.60839	-0.51049	-0.34266	-0.01053	1	0.82517	0.43783	0.31173	0.33566	0.15439	0.42657	0.18182	0.40559	0.65734	0.37762	0.08406	0.12587	-0.13287	0.17483	0.30123	0.20979	-0.45884	-0.34965	-0.32168	-0.31469	-0.0979	-0.11189	0.06294	0.27972	0.32168	-0.43357	-0.04196
g__norank_f__norank_o__norank_c__norank_p__WPS-2	-0.2822	-0.3007	-0.37063	-0.26573	-0.6014	-0.48951	-0.38179	-0.54545	-0.48252	-0.43082	-0.56643	-0.14685	-0.30123	-0.3986	-0.18214	-0.37762	-0.37478	-0.4965	-0.25874	-0.12587	0.12983	0.82517	1	0.30473	0.25919	0.41259	0.37895	0.65734	0.48951	0.62238	0.82517	0.15385	0.17163	0.03497	-0.18182	0.04895	0.2697	0.29371	-0.27321	-0.26573	-0.39161	-0.44056	-0.13986	-0.16084	-0.23077	0.11888	0.07692	-0.65035	-0.20979
g__unclassified_k__norank_d__Bacteria	0.03534	-0.01751	0.4028	0.41331	0.08757	0.03853	0.09298	0.18914	0.2697	0.22982	0.09807	0.05254	0.15439	0.22067	0.16491	0.18214	0.0807	-0.48687	-0.38179	-0.09807	-0.42531	0.43783	0.30473	1	0.84211	0.77408	-0.01406	0.17863	0.08406	0.60946	0.30823	0.28371	-0.11228	-0.00701	-0.11208	0.06305	-0.15439	-0.18914	-0.50175	-0.15061	0.01051	-0.33625	0.18914	0.41331	0.16813	0.23818	0.23818	-0.24518	-0.40981
g__norank_f__Isosphaeraceae	-0.18728	-0.10508	0.36778	0.38179	-0.03853	-0.16813	0.04561	0.14711	0.35026	0.20175	0.28371	0.12259	0.15614	0.28021	0.24561	0.12259	0.05614	-0.29072	-0.20315	-0.1296	-0.15114	0.31173	0.25919	0.84211	1	0.91769	0.30756	0.45534	0.28021	0.60596	0.32224	0.04553	-0.26316	-0.10508	-0.40631	-0.28722	-0.22105	-0.28722	-0.20877	0.05604	-0.05254	-0.22067	0.23468	0.14361	-0.01751	-0.05954	0.01401	-0.30473	-0.50088
g__norank_f__Gemmataceae	-0.16226	-0.06993	0.30769	0.30769	-0.21678	-0.2028	-0.09807	0.06993	0.12587	0.17513	0.21678	0.07692	0.15412	0.27273	0.2627	0.18182	0.07356	-0.23776	-0.06294	0	0.00702	0.33566	0.41259	0.77408	0.91769	1	0.41404	0.64336	0.51748	0.69231	0.54545	0	-0.21716	-0.13287	-0.44056	-0.39161	-0.10508	-0.17483	-0.19615	0.09091	-0.22378	-0.35664	0.11888	-0.08392	-0.29371	-0.21678	-0.2028	-0.51748	-0.57343
g__Candidatus_Koribacter	-0.56461	-0.26316	-0.2386	-0.12632	-0.39649	-0.45614	-0.44113	0.09123	0.12281	-0.15993	0.08421	0.31228	0.10545	0.12632	0.11951	-0.04912	-0.01406	-0.07018	0.21755	0.01754	0.28697	0.15439	0.37895	-0.01406	0.30756	0.41404	1	0.74386	0.74036	0.39298	0.50176	-0.57544	-0.51494	-0.56141	-0.70878	-0.72983	-0.4833	-0.43158	0.48506	0.28772	0.02456	0.0807	0.24912	-0.43509	-0.50527	-0.49123	-0.54386	-0.4386	-0.42456
g__unclassified_o__Acidobacteriales	-0.3598	-0.06294	-0.1049	-0.02098	-0.42657	-0.44056	-0.29422	-0.2028	-0.18881	-0.19965	-0.02797	0.15385	-0.01051	0.0979	0.33625	-0.02797	0.03152	0.03497	0.27273	0.16084	0.55439	0.42657	0.65734	0.17863	0.45534	0.64336	0.74386	1	0.8951	0.70629	0.83217	-0.14685	-0.11909	-0.02797	-0.52448	-0.48951	0.04203	-0.02797	0.09807	-0.06993	-0.45455	-0.43357	-0.26573	-0.52448	-0.74825	-0.58042	-0.56643	-0.81818	-0.60839
g__norank_f__norank_o__Acidobacteriales	-0.23987	0.06993	0	-0.03497	-0.21678	-0.26573	-0.22417	0.12587	-0.04895	-0.17163	0.07692	0.43357	0.33976	0.3986	0.51839	0.23776	0.30123	0.2028	0.54545	0.3986	0.50878	0.18182	0.48951	0.08406	0.28021	0.51748	0.74036	0.8951	1	0.68531	0.75524	-0.1958	-0.09457	-0.06294	-0.48951	-0.59441	-0.14361	-0.2028	0.15762	0.02797	-0.24476	-0.45455	-0.25874	-0.3986	-0.86713	-0.71329	-0.77622	-0.84615	-0.72727
g__norank_f__norank_o__B12-WMSP1	-0.0388	0.09091	0.04895	0.05594	-0.16084	-0.26573	-0.20666	0.05594	-0.01399	-0.08056	-0.0979	0.46853	0.2662	0.34965	0.45184	0.23077	0.28722	-0.06993	0.09091	0.24476	0.12983	0.40559	0.62238	0.60946	0.60596	0.69231	0.39298	0.70629	0.68531	1	0.70629	0.0979	0.02452	0.17483	-0.25874	-0.15385	-0.10158	-0.09091	-0.28021	-0.37762	-0.20979	-0.63636	-0.26573	0.1049	-0.5035	-0.24476	-0.27972	-0.76923	-0.81818
g__norank_f__Acidobacteriaceae_Subgroup_1	-0.27514	-0.04196	-0.01399	0.08392	-0.43357	-0.28671	-0.14361	-0.33566	-0.45455	-0.33275	-0.34965	-0.02797	-0.07356	-0.09091	0.18214	-0.04895	-0.05604	-0.23077	-0.02098	0.02797	0.26667	0.65734	0.82517	0.30823	0.32224	0.54545	0.50176	0.83217	0.75524	0.70629	1	0.21678	0.16813	0.04895	-0.11189	-0.12587	0.28371	0.25874	-0.27321	-0.37762	-0.46853	-0.67133	-0.34266	-0.34266	-0.55944	-0.21678	-0.27273	-0.9021	-0.48252
g__norank_f__norank_o__Elsterales	0.47621	0.34266	0.56643	0.55245	0.1049	0.28671	0.67251	-0.27972	-0.35664	-0.24869	-0.2028	-0.25175	0.08757	-0.05594	0.10858	0.06993	0.08056	0.02098	-0.25874	-0.06993	-0.10526	0.37762	0.15385	0.28371	0.04553	0	-0.57544	-0.14685	-0.1958	0.0979	0.21678	1	0.7951	0.74126	0.6014	0.46853	0.669	0.43357	-0.75307	-0.61538	-0.23776	-0.68531	-0.52448	0.24476	0.18881	0.32168	0.47552	-0.31469	-0.09091
g__norank_f__WWH38	0.49471	0.43082	0.31874	0.12609	0.03152	0.32574	0.57193	-0.31173	-0.49037	-0.22456	-0.23117	-0.11909	0.14561	-0.03853	0.1386	0.18564	0.18947	0.22767	0.04904	0.19615	0.12654	0.08406	0.17163	-0.11228	-0.26316	-0.21716	-0.51494	-0.11909	-0.09457	0.02452	0.16813	0.7951	1	0.73205	0.67251	0.47636	0.74737	0.58494	-0.42105	-0.47636	-0.36077	-0.69352	-0.63047	0.15061	0.01051	0.19264	0.32574	-0.31874	-0.02102
g__norank_f__JG30-KF-AS9	0.66317	0.53147	0.31469	0.27972	0.13287	0.18182	0.44133	-0.25175	-0.29371	-0.1366	-0.02098	-0.01399	0.09807	0.11888	0.35377	0.13986	0.29422	0.4965	0.18182	0.30769	0.37895	0.12587	0.03497	-0.00701	-0.10508	-0.13287	-0.56141	-0.02797	-0.06294	0.17483	0.04895	0.74126	0.73205	1	0.36364	0.34266	0.62347	0.33566	-0.45534	-0.56643	-0.3986	-0.62238	-0.81818	0.06294	-0.16084	-0.09091	0.13287	-0.29371	-0.25874
g__Bacillus	0.25398	0.25874	0.23077	0.11888	0.27972	0.46853	0.51839	-0.17483	-0.38462	-0.03853	-0.35664	-0.21678	-0.07706	-0.18881	-0.08406	0.13287	0.05604	-0.01399	-0.28671	-0.11888	-0.34386	-0.13287	-0.18182	-0.11208	-0.40631	-0.44056	-0.70878	-0.52448	-0.48951	-0.25874	-0.11189	0.6014	0.67251	0.36364	1	0.7972	0.57443	0.69231	-0.46585	-0.58741	-0.07692	-0.34266	-0.33566	0.35664	0.34965	0.52448	0.47552	0.11888	0.34266
g__Nocardioides	0.16226	0.13287	-0.08392	-0.12587	0.27273	0.37063	0.2697	-0.28671	-0.25874	0.10858	-0.3986	-0.37063	-0.42382	-0.41958	-0.18914	-0.1049	-0.14011	-0.32867	-0.44056	-0.11189	-0.31228	0.17483	0.04895	0.06305	-0.28722	-0.39161	-0.72983	-0.48951	-0.59441	-0.15385	-0.12587	0.46853	0.47636	0.34266	0.7972	1	0.49737	0.62238	-0.39229	-0.55245	-0.22378	-0.18881	-0.25874	0.40559	0.4965	0.64336	0.62937	0.27273	0.46853
g__Sporosarcina	0.26856	0.19965	0.09457	0.11559	-0.2662	0.08406	0.3	-0.72855	-0.77758	-0.21404	-0.36778	-0.61646	-0.42807	-0.47286	-0.14386	-0.19264	-0.22807	0.08757	-0.17863	-0.09457	0.2812	0.30123	0.2697	-0.15439	-0.22105	-0.10508	-0.4833	0.04203	-0.14361	-0.10158	0.28371	0.669	0.74737	0.62347	0.57443	0.49737	1	0.86165	-0.44561	-0.48336	-0.669	-0.52189	-0.64098	-0.29422	-0.04203	0.17863	0.29772	-0.25219	0.24518
g__unclassified_o__Saccharimonadales	-0.04233	-0.1049	-0.1958	-0.18881	-0.29371	-0.08392	0.05954	-0.73427	-0.8042	-0.30123	-0.65035	-0.5035	-0.52189	-0.59441	-0.35026	-0.32867	-0.40631	-0.11888	-0.34965	-0.31469	-0.00351	0.20979	0.29371	-0.18914	-0.28722	-0.17483	-0.43158	-0.02797	-0.2028	-0.09091	0.25874	0.43357	0.58494	0.33566	0.69231	0.62238	0.86165	1	-0.45884	-0.51748	-0.44755	-0.34266	-0.3986	-0.11189	0.07692	0.3986	0.33566	-0.13986	0.3986
g__Gemmatimonas	-0.17845	0.15061	-0.2697	-0.33976	0.06655	0.14711	-0.21404	0.31173	0.37828	0.4386	0.5289	0.1331	0	0.15061	0.17193	0.20315	0.23158	0.24518	0.51138	0.41331	0.45343	-0.45884	-0.27321	-0.50175	-0.20877	-0.19615	0.48506	0.09807	0.15762	-0.28021	-0.27321	-0.75307	-0.42105	-0.45534	-0.46585	-0.39229	-0.44561	-0.45884	1	0.59545	-0.08056	0.46935	0.18214	-0.41681	-0.24518	-0.51138	-0.43783	0.29422	0.07706
g__unclassified_f__Intrasporangiaceae	-0.20459	-0.26573	-0.0979	-0.27972	0.04895	-0.00699	-0.19615	0.37063	0.48252	0.28722	0.47552	0.00699	0.15762	0.15385	-0.11909	0.01399	-0.08757	-0.05594	0.32168	0.11189	0.01754	-0.34965	-0.26573	-0.15061	0.05604	0.09091	0.28772	-0.06993	0.02797	-0.37762	-0.37762	-0.61538	-0.47636	-0.56643	-0.58741	-0.55245	-0.48336	-0.51748	0.59545	1	0.26573	0.62937	0.63636	-0.13287	0.06294	-0.23776	-0.26573	0.39161	0.23776
g__Allorhizobium-Neorhizobium-Pararhizobium-Rhizobium	-0.21518	-0.46154	-0.02797	-0.07692	0.25175	-0.1958	-0.06305	0.47552	0.47552	-0.28371	-0.08392	0.5035	0.44483	0.23776	-0.23468	-0.1049	-0.08757	-0.11189	-0.13986	-0.36364	-0.68421	-0.32168	-0.39161	0.01051	-0.05254	-0.22378	0.02456	-0.45455	-0.24476	-0.20979	-0.46853	-0.23776	-0.36077	-0.3986	-0.07692	-0.22378	-0.669	-0.44755	-0.08056	0.26573	1	0.52448	0.67832	0.62238	0.44056	0.30769	0.11189	0.37762	0.09091
g__Arthrobacter	-0.37038	-0.53846	-0.46154	-0.37762	0.02098	-0.23077	-0.3993	0.12587	0.37762	0.08406	0.08392	-0.11189	-0.27671	-0.26573	-0.5289	-0.42657	-0.44133	-0.18881	-0.15385	-0.37063	-0.26667	-0.31469	-0.44056	-0.33625	-0.22067	-0.35664	0.0807	-0.43357	-0.45455	-0.63636	-0.67133	-0.68531	-0.69352	-0.62238	-0.34266	-0.18881	-0.52189	-0.34266	0.46935	0.62937	0.52448	1	0.73427	0.01399	0.45455	0.17483	0.08392	0.8042	0.60839
g__Terrabacter	-0.51854	-0.68531	-0.20979	-0.23077	-0.02797	-0.25175	-0.30123	0.26573	0.45455	0.02102	0	0.03497	0.00701	-0.11189	-0.50788	-0.28671	-0.42732	-0.57343	-0.37063	-0.5035	-0.66316	-0.0979	-0.13986	0.18914	0.23468	0.11888	0.24912	-0.26573	-0.25874	-0.26573	-0.34266	-0.52448	-0.63047	-0.81818	-0.33566	-0.25874	-0.64098	-0.3986	0.18214	0.63636	0.67832	0.73427	1	0.32867	0.55245	0.39161	0.21678	0.51049	0.36364
g__Ralstonia	0.07408	-0.12587	0.16084	-0.05594	0.51049	0.16783	0.2662	0.40559	0.42657	-0.02452	-0.13287	0.42657	0.4028	0.25874	0	0.12587	0.11208	-0.28671	-0.26573	-0.13287	-0.7579	-0.11189	-0.16084	0.41331	0.14361	-0.08392	-0.43509	-0.52448	-0.3986	0.1049	-0.34266	0.24476	0.15061	0.06294	0.35664	0.40559	-0.29422	-0.11189	-0.41681	-0.13287	0.62238	0.01399	0.32867	1	0.59441	0.58042	0.46853	0.25874	0.01399
g__Sphingomonas	-0.05997	-0.35664	-0.00699	0	0.16783	0.0979	0.20666	-0.07692	0.18182	-0.00701	-0.1958	-0.33566	-0.24869	-0.41259	-0.59895	-0.36364	-0.45534	-0.55245	-0.71329	-0.59441	-0.75439	0.06294	-0.23077	0.16813	-0.01751	-0.29371	-0.50527	-0.74825	-0.86713	-0.5035	-0.55944	0.18881	0.01051	-0.16084	0.34965	0.4965	-0.04203	0.07692	-0.24518	0.06294	0.44056	0.45455	0.55245	0.59441	1	0.86713	0.87413	0.71329	0.66434
g__Massilia	-0.07408	-0.42657	-0.16084	-0.11189	-0.1049	-0.06993	0.02452	-0.33566	-0.20979	-0.22767	-0.58741	-0.35664	-0.34326	-0.57343	-0.71103	-0.44056	-0.56042	-0.67133	-0.86014	-0.66434	-0.7965	0.27972	0.11888	0.23818	-0.05954	-0.21678	-0.49123	-0.58042	-0.71329	-0.24476	-0.21678	0.32168	0.19264	-0.09091	0.52448	0.64336	0.17863	0.3986	-0.51138	-0.23776	0.30769	0.17483	0.39161	0.58042	0.86713	1	0.90909	0.41958	0.58042
g__norank_f__LWQ8	0.13404	-0.1958	0.00699	0.08392	-0.1049	0.04196	0.21366	-0.3986	-0.18182	-0.12609	-0.37762	-0.46154	-0.36077	-0.55245	-0.59895	-0.37762	-0.45534	-0.52448	-0.81818	-0.55944	-0.58597	0.32168	0.07692	0.23818	0.01401	-0.2028	-0.54386	-0.56643	-0.77622	-0.27972	-0.27273	0.47552	0.32574	0.13287	0.47552	0.62937	0.29772	0.33566	-0.43783	-0.26573	0.11189	0.08392	0.21678	0.46853	0.87413	0.90909	1	0.42657	0.51748
g__Burkholderia-Caballeronia-Paraburkholderia	0.0388	-0.16084	-0.18182	-0.18881	0.29371	0.22378	-0.01751	0.15385	0.35664	0.36427	0.18182	-0.25874	-0.2697	-0.23776	-0.44133	-0.17483	-0.23117	-0.13287	-0.25874	-0.23776	-0.38597	-0.43357	-0.65035	-0.24518	-0.30473	-0.51748	-0.4386	-0.81818	-0.84615	-0.76923	-0.9021	-0.31469	-0.31874	-0.29371	0.11888	0.27273	-0.25219	-0.13986	0.29422	0.39161	0.37762	0.8042	0.51049	0.25874	0.71329	0.41958	0.42657	1	0.72727
g__Leifsonia	-0.22929	-0.41259	-0.38462	-0.36364	-0.02098	0.04196	-0.04203	-0.36364	-0.18182	-0.03152	-0.30769	-0.65734	-0.62697	-0.72028	-0.72855	-0.55245	-0.65499	-0.39161	-0.43357	-0.48252	-0.31228	-0.04196	-0.20979	-0.40981	-0.50088	-0.57343	-0.42456	-0.60839	-0.72727	-0.81818	-0.48252	-0.09091	-0.02102	-0.25874	0.34266	0.46853	0.24518	0.3986	0.07706	0.23776	0.09091	0.60839	0.36364	0.01399	0.66434	0.58042	0.51748	0.72727	1
g__norank_f__Acetobacteraceae	-0.39224	-0.30823	0.08757	0.12609	0.06305	0.17163	0.34035	-0.15412	-0.03152	-0.10351	-0.09457	-0.54991	-0.3193	-0.47286	-0.47719	-0.33976	-0.4614	-0.37478	-0.3993	-0.54641	-0.34798	0.00701	-0.24168	-0.27193	-0.24561	-0.34326	-0.08787	-0.38879	-0.46235	-0.73555	-0.22767	0.05954	-0.02456	-0.4028	0.29422	0.16462	0.12632	0.17863	0.08596	0.21716	0.17863	0.40981	0.40981	-0.06655	0.56392	0.40631	0.3958	0.43783	0.72154
[truncated: 1 more columns]
